# Supplementary material
Source: publisher figshare collection journal article supplement (https://frontiersin.figshare.com/ndownloader/files/34023935)
Supplement: Supplementary file [file 34023935]

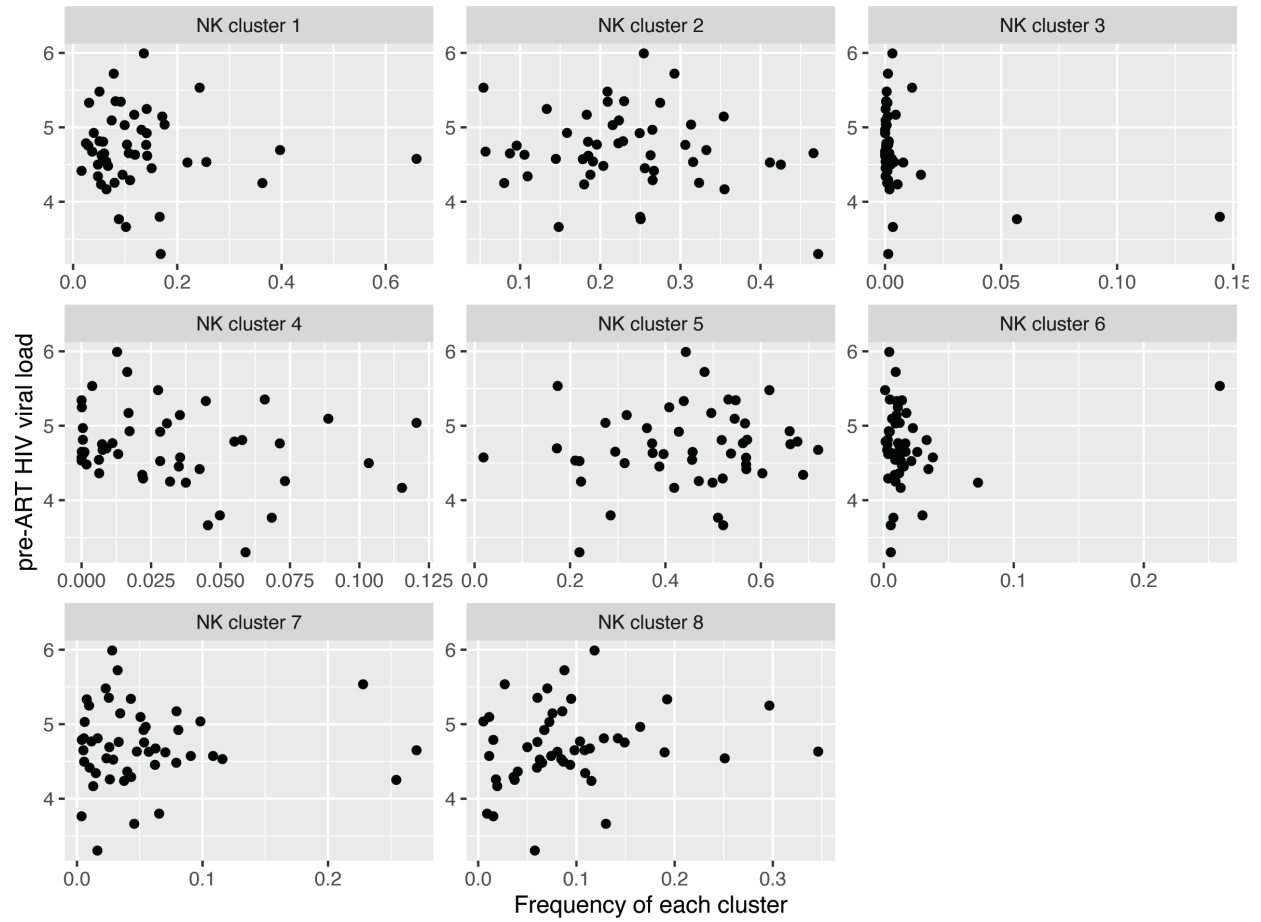

Supplemental figure 9. **Relationship between NK cell clusters and pre-ART HIV viral load.** Scatterplots showing the relationship between the frequency of each of the NK cell metaclusters and pre-ART HIV viral load.
